# Supplementary material for: Lung Ultrasound in the Evaluation of Lung Disease Severity in Children with Clinically Stable Cystic Fibrosis: A Prospective Cross-Sectional Study
Source: MDPI journal article supplement (doi:10.3390/jcm12093086), 2023-04-24
Supplement: s1 [file s1]

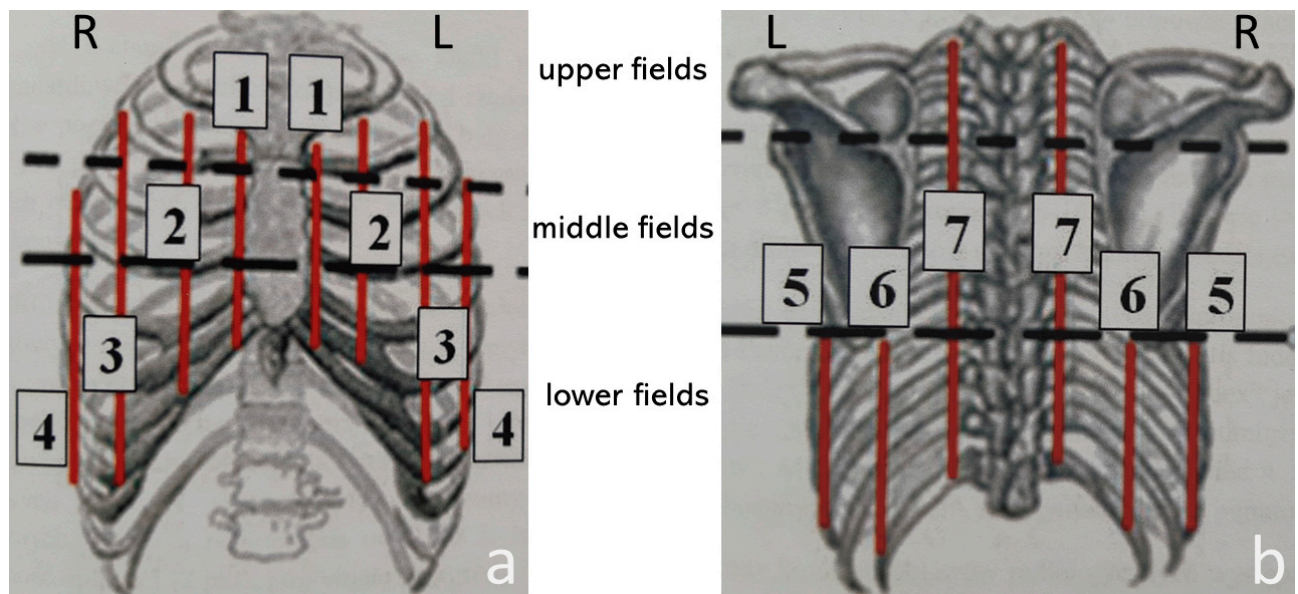

**Figure S1** Division of the chest into lung fields [30]

**(a) anterior:**

- *upper field* – the supraclavicular fossa and the 1<sup>st</sup> intercostal space (**aUL** – anterior upper left, **aUR** – anterior upper right);
- *middle field* – the 2<sup>nd</sup> and the 3<sup>rd</sup> intercostal space (**aML** – anterior middle left, **aMR** – anterior middle right);
- *lower field* – from the 4<sup>th</sup> intercostal space to the lung base (**aLL** – anterior lower left, **aLR** – anterior lower right)

**(b) posterior:**

- *upper field* – from the apex of the lung to the 3<sup>rd</sup> intercostal space (**pUL** – posterior upper left, **pUR** – posterior upper right);
- *middle field* – from the 4<sup>th</sup> to the 6<sup>th</sup> intercostal space (**pML** – posterior middle left, **pMR** – posterior middle right);
- *lower field* – from the 7<sup>th</sup> intercostal space to the lung base (**pLL** – posterior lower left, **pLR** – posterior lower right)

**R** – right, **L** – left, **1** – parasternal line, **2** – midclavicular line, **3** – anterior axillary line, **4** – midaxillary line,  
**5** – posterior axillary line, **6** – scapular line, **7** – paravertebral line

**Table S1** Modified Chrispin-Norman score [35,36]

| feature                       | not present | present, not marked | marked |
|-------------------------------|-------------|---------------------|--------|
| <b>overinflation</b>          |             |                     |        |
| diaphragmatic depression      | 0           | 1                   | 2      |
| chest wall shape              | 0           | 1                   | 2      |
| lung fields                   | 0           | 1                   | 2      |
| <b>bronchial line shadows</b> |             |                     |        |
| right upper zone (RU)         | 0           | 1                   | 2      |
| left upper zone (LU)          | 0           | 1                   | 2      |
| right lower zone (RL)         | 0           | 1                   | 2      |
| left lower zone (LL)          | 0           | 1                   | 2      |
| <b>ring shadows</b>           |             |                     |        |
| RU                            | 0           | 1                   | 2      |
| LU                            | 0           | 1                   | 2      |
| RL                            | 0           | 1                   | 2      |
| LL                            | 0           | 1                   | 2      |
| <b>mottled shadows</b>        |             |                     |        |
| RU                            | 0           | 1                   | 2      |
| LU                            | 0           | 1                   | 2      |
| RL                            | 0           | 1                   | 2      |
| LL                            | 0           | 1                   | 2      |
| <b>large soft shadows</b>     |             |                     |        |
| RU                            | 0           | 1                   | 2      |
| LU                            | 0           | 1                   | 2      |
| RL                            | 0           | 1                   | 2      |
| LL                            | 0           | 1                   | 2      |

maximum score – 38 points

**Table S2** Strength of agreement depending on the value of the  $\kappa$  coefficient [45]

| $\kappa$ coefficient value | strength of agreement |
|----------------------------|-----------------------|
| < 0.20                     | slight                |
| 0.21 - 0.40                | fair                  |
| 0.41 - 0.60                | moderate              |
| 0.61 - 0.80                | good                  |
| 0.81 - 1.00                | very good             |

**Table S3** Guilford's interpretation of the magnitude of correlation [48]

| R-value              | interpretation                        |
|----------------------|---------------------------------------|
| $ R =0$              | lack of correlation                   |
| $0.0 <  R  \leq 0.1$ | slight, almost negligible correlation |
| $0.1 <  R  \leq 0.3$ | low correlation                       |
| $0.3 <  R  \leq 0.5$ | moderate correlation                  |
| $0.5 <  R  \leq 0.7$ | high correlation                      |
| $0.7 <  R  \leq 0.9$ | very high correlation                 |
| $0.9 <  R  < 1.0$    | almost complete correlation           |
| $ R =1$              | complete correlation                  |

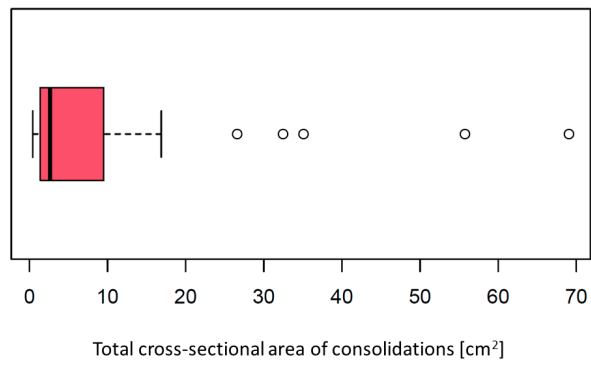

**Figure S2.** Total cross-sectional area of consolidations

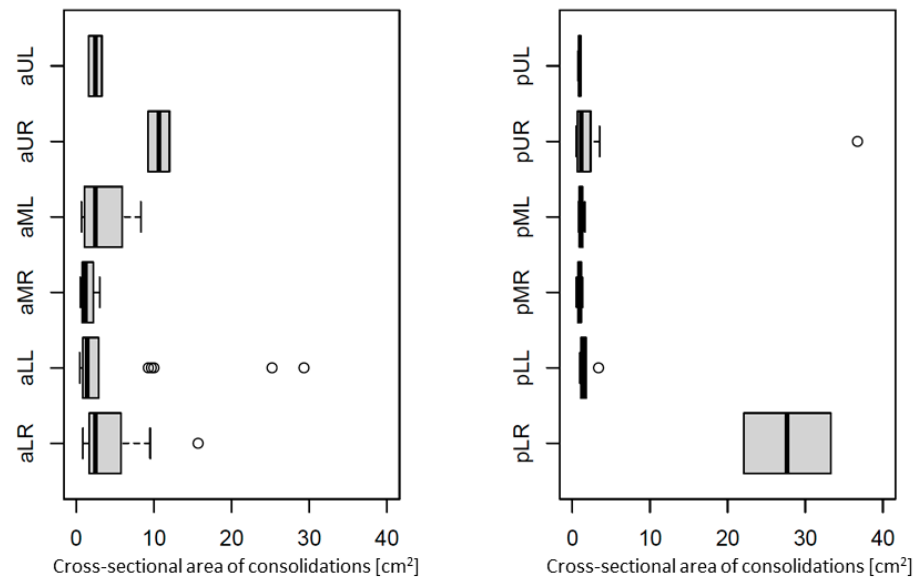

**Figure S3.** Cross-sectional area of consolidations in individual lung fields

lung fields: **aUL** – anterior upper left, **aUR** – anterior upper right, **aML** – anterior middle left, **aMR** – anterior middle right, **aLL** – anterior lower left, **aLR** – anterior lower right, **pUL** – posterior upper left, **pUR** – posterior upper right, **pML** – posterior middle left, **pMR** – posterior middle right, **pLL** – posterior lower left, **pLR** – posterior lower right

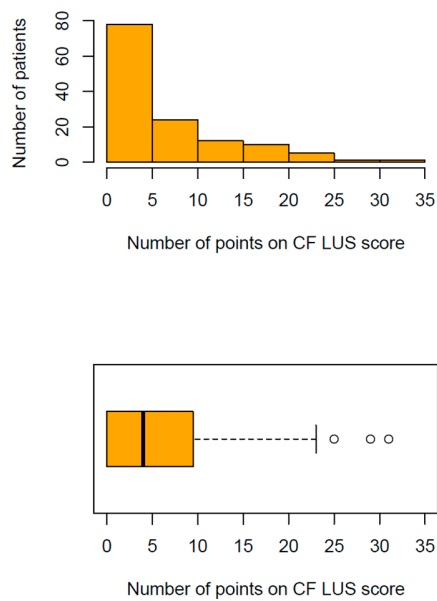

**Figure S4.** Distribution of the number of points on the CF LUS score in the study group

**Table S4.** Number of points on the CF LUS score in individual age groups

| age group                     | number of children | number of points on CF LUS score |                 |            |
|-------------------------------|--------------------|----------------------------------|-----------------|------------|
|                               |                    | mean $\pm$ SD                    | median [Q1; Q3] | [min; max] |
| infants (2–12 months)         | 16                 | 0.13 $\pm$ 0.34                  | 0 [0.0; 0.0]    | [0; 1]     |
| toddlers (13–36 months)       | 15                 | 1.13 $\pm$ 2.67                  | 0 [0.0; 0.5]    | [0; 9]     |
| preschoolers (4–6 years)      | 29                 | 2.72 $\pm$ 3.81                  | 2 [0.0; 3.0]    | [0; 18]    |
| middle childhood (7–10 years) | 22                 | 6.14 $\pm$ 6.36                  | 4 [3.0; 8.8]    | [0; 29]    |
| teenagers (10+ years)         | 49                 | 11.76 $\pm$ 6.82                 | 11 [7.0; 16.0]  | [0; 31]    |

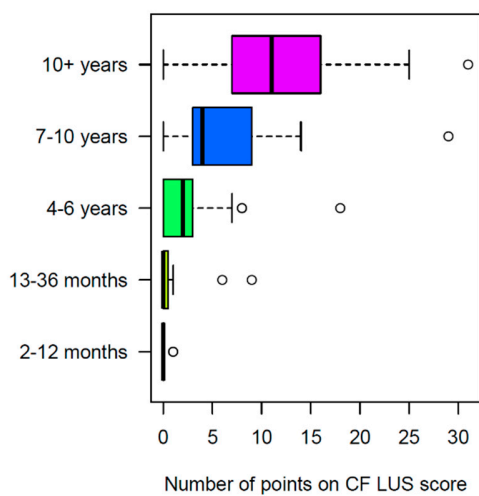

**Figure S5.** Distribution of the number of points on the CF LUS score in individual age groups

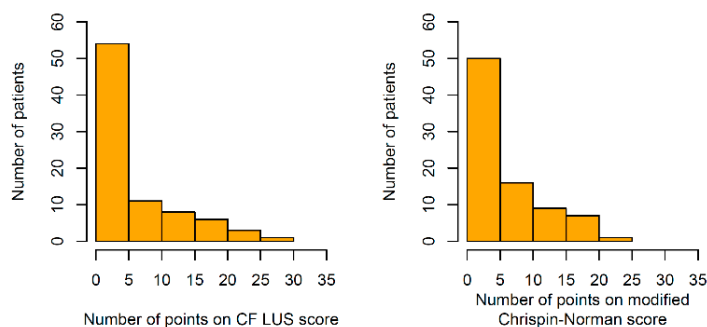

**Figure S6.** Distribution of the number of points on the ultrasound and radiographic scores

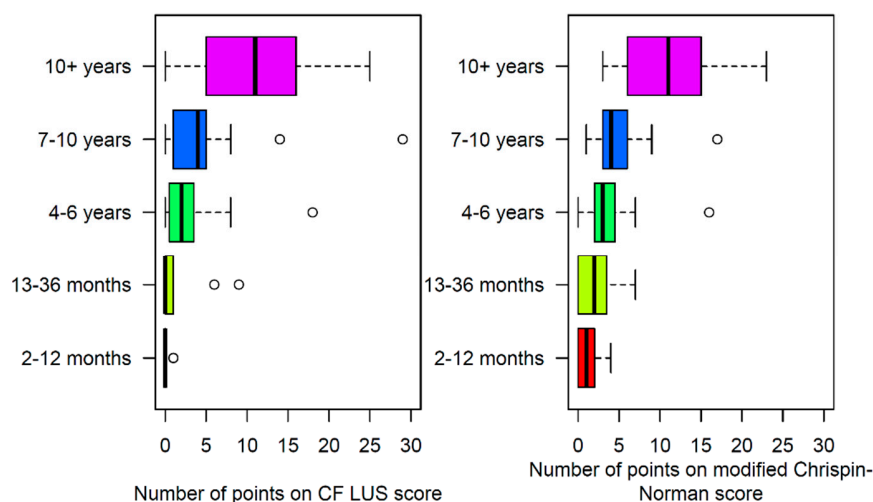

**Figure S7.** Comparison of the number of points in individual age groups for ultrasound and radiographic scores

**Table S5.** Interobserver agreement for assessing the incidence of I-lines

| lung field | $\kappa$ values | 95% CI       | lung field | $\kappa$ values | 95% CI        |
|------------|-----------------|--------------|------------|-----------------|---------------|
| aUL        | 0.42            | [0.08; 0.69] | aUR        | 0.53            | [0.20; 0.77]  |
| aML        | 0.63            | [0.31; 0.85] | aMR        | 0.63            | [0.31; 0.85]  |
| aLL        | 0.79            | [0.50; 0.94] | aLR        | 1.00            | [0.81; 1.00]  |
| pUL        | 0.53            | [0.20; 0.77] | pUR        | 0.57            | [0.25; 0.81]  |
| pML        | 0.37            | [0.03; 0.65] | pMR        | 0.26            | [-0.08; 0.56] |
| pLL        | 0.79            | [0.40; 0.94] | pLR        | 0.68            | [0.37; 0.88]  |
| LL-A       | 0.84            | [0.57; 0.97] | RL-A       | 0.95            | [0.72; 1.00]  |
| LL-P       | 0.84            | [0.57; 0.97] | RL-P       | 0.79            | [0.50; 0.94]  |

$\kappa$ - kappa coefficient, 95% CI – 95% confidence interval

lung fields: **aUL** – anterior upper left, **aUR** – anterior upper right, **aML** – anterior middle left, **aMR** – anterior middle right, **aLL** – anterior lower left, **aLR** – anterior lower right, **pUL** – posterior upper left, **pUR** – posterior upper right, **pML** – posterior middle left, **pMR** – posterior middle right, **pLL** – posterior lower left, **pLR** – posterior lower right, **LL-A** – left lung – anterior fields, **RL-A** – right lung – anterior fields, **LL-P** – left lung – posterior fields, **RL-P** – right lung – posterior fields

**Table S6.** Interobserver agreement for assessing the incidence of Z-lines

| lung field | $\kappa$ values | 95% CI        | lung field | $\kappa$ values | 95% CI        |
|------------|-----------------|---------------|------------|-----------------|---------------|
| aUL        | 0.26            | [-0.08; 0.56] | aUR        | 0.16            | [-0.18; 0.47] |
| aML        | 0.05            | [-0.28; 0.38] | aMR        | 0.53            | [0.20; 0.77]  |
| aLL        | 0.32            | [-0.03; 0.61] | aLR        | 0.47            | [0.14; 0.73]  |
| pUL        | 0.37            | [0.03; 0.65]  | pUR        | 0.53            | [0.20; 0.77]  |
| pML        | 0.26            | [-0.08; 0.56] | pMR        | 0.26            | [-0.08; 0.56] |
| pLL        | 0.37            | [0.03; 0.65]  | pLR        | 0.47            | [0.14; 0.73]  |
| LL-A       | 0.53            | [0.19; 0.77]  | RL-A       | 0.53            | [0.19; 0.77]  |
| LL-P       | 0.21            | [-0.13; 0.52] | RL-P       | 0.63            | [0.31; 0.85]  |

**Table S7.** Interobserver agreement for assessing the incidence of single B-lines

| lung field | $\kappa$ values | 95% CI       | lung field | $\kappa$ values | 95% CI       |
|------------|-----------------|--------------|------------|-----------------|--------------|
| aUL        | 0.53            | [0.23; 0.84] | aUR        | 0.53            | [0.20; 0.77] |
| aML        | 0.63            | [0.31; 0.85] | aMR        | 0.79            | [0.50; 0.94] |
| aLL        | 0.89            | [0.65; 0.99] | aLR        | 0.68            | [0.37; 0.88] |
| pUL        | 0.37            | [0.03; 0.65] | pUR        | 0.37            | [0.03; 0.65] |
| pML        | 0.47            | [0.14; 0.73] | pMR        | 0.53            | [0.30; 0.77] |
| pLL        | 0.68            | [0.37; 0.88] | pLR        | 0.79            | [0.50; 0.94] |
| LL-A       | 0.95            | [0.72; 1.00] | RL-A       | 0.95            | [0.72; 1.00] |
| LL-P       | 0.95            | [0.72; 1.00] | RL-P       | 1.00            | [0.81; 1.00] |

**Table S8.** Interobserver agreement for assessing the incidence of numerous B-lines

| lung field | $\kappa$ values | 95% CI       | lung field | $\kappa$ values | 95% CI       |
|------------|-----------------|--------------|------------|-----------------|--------------|
| aUL        | 1.00            | [0.82; 1.00] | aUR        | 1.00            | [0.82; 1.00] |
| aML        | 0.95            | [0.72; 1.00] | aMR        | 1.00            | [0.82; 1.00] |
| aLL        | 0.95            | [0.72; 1.00] | aLR        | 0.95            | [0.72; 1.00] |
| pUL        | 0.95            | [0.72; 1.00] | pUR        | 0.95            | [0.72; 1.00] |
| pML        | 0.95            | [0.72; 1.00] | pMR        | 0.84            | [0.57; 0.97] |
| pLL        | 0.89            | [0.65; 0.99] | pLR        | 0.95            | [0.72; 1.00] |
| LL-A       | 0.95            | [0.72; 1.00] | RL-A       | 0.95            | [0.72; 1.00] |
| LL-P       | 0.79            | [0.50; 0.94] | RL-P       | 0.79            | [0.50; 0.94] |

**Table S9.** Interobserver agreement for assessing the incidence of Am-lines

| lung field | $\kappa$ values | 95% CI       | lung field | $\kappa$ values | 95% CI       |
|------------|-----------------|--------------|------------|-----------------|--------------|
| aUL        | 0.74            | [0.44; 0.91] | aUR        | 0.79            | [0.50; 0.94] |
| aML        | 0.79            | [0.50; 0.94] | aMR        | 0.79            | [0.50; 0.94] |
| aLL        | 0.95            | [0.72; 1.00] | aLR        | 0.63            | [0.31; 0.85] |
| pUL        | 0.89            | [0.65; 0.99] | pUR        | 0.95            | [0.72; 1.00] |
| pML        | 1.00            | [0.81; 1.00] | pMR        | 0.79            | [0.50; 0.94] |
| pLL        | 0.79            | [0.50; 0.94] | pLR        | 0.95            | [0.72; 1.00] |
| LL-A       | 0.84            | [0.57; 0.97] | RL-A       | 0.79            | [0.50; 0.94] |
| LL-P       | 0.79            | [0.50; 0.94] | RL-P       | 0.84            | [0.57; 0.97] |

**Table S10.** Interobserver agreement for assessing the incidence of pleural line abnormalities

| lung field | $\kappa$ values | 95% CI       | lung field | $\kappa$ values | 95% CI        |
|------------|-----------------|--------------|------------|-----------------|---------------|
| aUL        | 0.84            | [0.57; 0.97] | aUR        | 0.79            | [0.50; 0.94]  |
| aML        | 0.58            | [0.25; 0.81] | aMR        | 0.32            | [0.00; 0.61]  |
| aLL        | 0.84            | [0.57; 0.97] | aLR        | 0.63            | [0.31; 0.85]  |
| pUL        | 0.68            | [0.37; 0.88] | pUR        | 0.63            | [0.31; 0.85]  |
| pML        | 0.32            | [0.00; 0.61] | pMR        | 0.37            | [0.03; 0.65]  |
| pLL        | 0.58            | [0.25; 0.81] | pLR        | 0.26            | [-0.08; 0.56] |
| LL-A       | 0.68            | [0.37; 0.88] | RL-A       | 0.79            | [0.50; 0.94]  |
| LL-P       | 0.53            | [0.20; 0.77] | RL-P       | 0.42            | [0.08; 0.69]  |

**Table S11.** Interobserver agreement for assessing the incidence of small consolidations

| lung field | $\kappa$ values | 95% CI       | lung field | $\kappa$ values | 95% CI       |
|------------|-----------------|--------------|------------|-----------------|--------------|
| aUL        | 0.89            | [0.65; 0.99] | aUR        | 1.00            | [0.81; 1.00] |
| aML        | 0.84            | [0.57; 0.97] | aMR        | 0.84            | [0.57; 0.97] |
| aLL        | 0.74            | [0.44; 0.91] | aLR        | 0.68            | [0.37; 0.88] |
| pUL        | 0.84            | [0.57; 0.97] | pUR        | 0.95            | [0.72; 1.00] |
| pML        | 0.79            | [0.50; 0.94] | pMR        | 0.84            | [0.57; 0.97] |
| pLL        | 0.79            | [0.50; 0.94] | pLR        | 0.89            | [0.65; 0.99] |
| LL-A       | 0.75            | [0.50; 0.91] | RL-A       | 0.84            | [0.57; 0.97] |
| LL-P       | 0.47            | [0.14; 0.73] | RL-P       | 0.68            | [0.37; 0.88] |

**Table S12.** Interobserver agreement for assessing the incidence of major consolidations

| lung field | $\kappa$ values | 95% CI       | lung field | $\kappa$ values | 95% CI       |
|------------|-----------------|--------------|------------|-----------------|--------------|
| aUL        | 1.00            | [0.81; 1.00] | aUR        | 1.00            | [0.81; 1.00] |
| aML        | 0.95            | [0.72; 1.00] | aMR        | 0.89            | [0.65; 0.99] |
| aLL        | 0.95            | [0.72; 1.00] | aLR        | 0.79            | [0.50; 0.94] |
| pUL        | 0.95            | [0.72; 1.00] | pUR        | 1.00            | [0.81; 1.00] |
| pML        | 0.95            | [0.72; 1.00] | pMR        | 0.95            | [0.72; 1.00] |
| pLL        | 0.89            | [0.65; 0.99] | pLR        | 0.95            | [0.72; 1.00] |
| LL-A       | 1.00            | [0.81; 1.00] | RL-A       | 1.00            | [0.81; 1.00] |
| LL-P       | 1.00            | [0.81; 1.00] | RL-P       | 1.00            | [0.81; 1.00] |

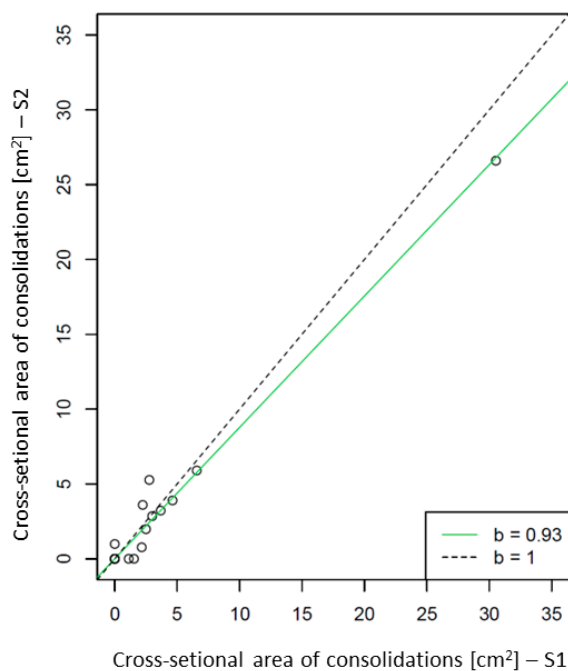**Figure S8.** Comparison of the total cross-sectional area of consolidations obtained by two sonographers

S1 – first sonographer, S2 – second sonographer, b – slope of simple linear regression, 95%CI [0.81; 1.05]

**Table S13** Comparison of ultrasound scores in CF

|                                                      |                                                           | Peixoto 2019<br>[22] | Strzelczuk-<br>Judka 2019 [23] | Peixoto 2020<br>[24] | Ciucă 2022<br>[26] | Jaworska<br>2023 |
|------------------------------------------------------|-----------------------------------------------------------|----------------------|--------------------------------|----------------------|--------------------|------------------|
| assessed ultrasound signs                            | numerous B-lines                                          | +                    | +                              | +                    | +                  | +                |
|                                                      | confluent B-lines                                         | —                    | +                              | —                    | +                  | +                |
|                                                      | consolidations                                            | +                    | +                              | +                    | +                  | +                |
|                                                      | atelectasis<br>distinguished from<br>other consolidations | —                    | —                              | —                    | +                  | —                |
|                                                      | equivalent of<br>bronchiectasis                           | —                    | —                              | —                    | *                  | Am-lines         |
|                                                      | pleural line<br>abnormalities                             | —                    | +                              | +                    | —                  | +                |
|                                                      | pleural fluid                                             | —                    | +                              | —                    | —                  | —                |
| number of assessed lung fields                       |                                                           | 12                   | 4                              | 12                   | 12                 | 12               |
| max. possible score                                  |                                                           | 36                   | 40                             | 36                   | —                  | 44               |
| max. number of points<br>obtained in the study group |                                                           | 18                   | 16                             | 18                   | 21                 | 31               |
| correlation between LUS score<br>and                 | CXR score                                                 | —                    | R = 0.52                       | —                    | —                  | R = 0.87         |
|                                                      | chest CT score                                            | —                    | —                              | par. cor. = 0.61     | R = 0.87           | —                |
|                                                      | age                                                       | —                    | —                              | —                    | —                  | R = 0.70         |
|                                                      | LCI                                                       | —                    | —                              | —                    | R = 0.80           | R = 0.59         |
|                                                      | FEV1                                                      | —                    | —                              | par. cor. = -0.54    | R = -0.65          | R = -0.63        |

\* The following US signs were considered the equivalent of bronchiectasis: 1. > 3 B-lines and 1 coalescent B-line; 2. > 2 coalescent B-lines; 3. bronchial wall thickening or subpleural consolidations < 10 mm

LUS – lung ultrasound, CXR – chest X ray, CT – computed tomography, LCI – lung clearance index, FEV1 – forced expiratory volume in 1 second, R – Pearson's correlation coefficient, par. cor. – partial correlation
